# A composite biomarker for esophageal cancer risk from automated analysis of a non-endoscopic device

Adam G. Berman,<sup>1</sup> Rebecca C. Fitzgerald,<sup>2,a</sup> Florian Markowitz<sup>1,a\*</sup>

<sup>1</sup>Cancer Research UK Cambridge Institute, University of Cambridge, UK

<sup>2</sup>Medical Research Council Cancer Unit, University of Cambridge, UK

<sup>a</sup>These authors share senior authorship

\*To whom correspondence should be addressed; E-mail: [florian.markowitz@cruk.cam.ac.uk](mailto:florian.markowitz@cruk.cam.ac.uk)

## *Abstract*

**Barrett's esophagus containing intestinal metaplasia predisposes to cancer, yet the majority of cases are undiagnosed. The length of a Barrett's segment is a key indicator of cancer risk, but measuring it has so far relied on endoscopy, which is expensive and invasive. Cytosponge-TFF3 is a minimally-invasive test that identifies intestinal metaplasia for endoscopic confirmation. We report a machine learning technique to quantify the extent of intestinal metaplasia and predict Barrett's segment length from whole-slide image tile counts automatically generated from Cytosponge-TFF3 histology slides. Utilizing data from 529 patients, our segment length prediction model achieves an average validation fold accuracy of 0.84. Applying this algorithm to an independent test set of 162 patients from a screening trial shows a precision of 0.90 for identifying short-segment disease. This advance will enable higher-risk patients to be prioritized for endoscopy while saving more than half of Cytosponge-TFF3-positive patients from endoscopy in the screening setting.**

## 19 Main

20 Esophageal adenocarcinoma (EAC) is the sixth leading cause of cancer-related death with an  
21 abysmal 5-year survival of 13%, usually only manifesting at a late stage (1, 2). Barrett’s esoph-  
22 agus (BE) is a precursor to EAC and its high prevalence in the Western world (3, 4) makes it  
23 an attractive target for early detection of EAC. Traditionally, BE has been diagnosed with an  
24 invasive endoscopy of the upper gastrointestinal tract. The Cytosponge is a minimally inva-  
25 sive alternative to endoscopy consisting of a soluble vegetarian capsule containing a compacted  
26 sponge tethered to a thread (5) (**fig. 1a**). The patient swallows the capsule, and once in the  
27 proximal stomach, the capsule dissolves and the spherical sponge expands. The sponge is with-  
28 drawn using the thread and collects several million cells from the upper stomach and esophagus  
29 along its passage. Sections of tissue retrieved by the sponge are stained with H&E and trefoil  
30 factor 3 (TFF3) (**fig. 1a**), the diagnostic biomarker for intestinal metaplasia (IM) in Cytosponge-  
31 TFF3 (6).

32 Reviewing stained Cytosponge histology can be time consuming and our recent work has  
33 shown that a deep learning triage approach on a digitized whole-slide image (WSI) of the TFF3  
34 slide (**fig. 1a**) performs the tasks of pathologists with high accuracy and can reduce pathologist  
35 workload by 57% (7). This was a substantial step forward to making the Cytosponge-TFF3  
36 test widely applicable, but a major limitation remained: although BE is a precursor to cancer,  
37 not all BE cases carry the same risk (8, 9). Risk of cancer progression in BE can be estimated  
38 by two clinical predictors: the first one is the presence of intestinal metaplasia (IM) defined  
39 by mucin-containing cells called goblet cells, which our previous work was able to identify  
40 automatically from Cytosponge slides (7). The second one is the length of the BE segment,  
41 measured by the Prague classification as the circumferential (C) and maximal (M) distance the  
42 Barrett’s segment reaches from the gastroesophageal junction (10, 11) (**fig. 1b**). The presence

43 of IM and the length of the Barrett's segment dictates whether regular endoscopic surveillance  
44 or monitoring is required (11, 12). However, neither routine pathology review nor our novel  
45 automated predictor measure Barrett's segment length (which is usually only attainable via  
46 endoscopy) and in all cases endoscopy follow-up is required if IM (TFF3 positivity) is detected  
47 in the Cytosponge sample.

48 Of all patients with a TFF3-positive Cytosponge test, 59% had a diagnosis of BE containing  
49 IM confirmed across a range of lengths (M length <1 to 15 cm) and in patients with no visible  
50 Barrett's (M0), 33% had IM of the cardia identified from a single cardia biopsy (13). Currently,  
51 100% of TFF3-positive patients are sent for endoscopy. Better identification of the 41% of  
52 TFF3-positive patients who do not end up having BE upon endoscopy could deprioritize a  
53 substantial fraction of TFF3-positive patients from invasive endoscopy and the large amount of  
54 resources required to perform them.

55 To address this challenge, we asked whether it would be possible to use machine learning on  
56 Cytosponge-TFF3 to quantify the extent of IM, and correlate that quantity with Prague length  
57 measurements (**fig. 1c**). This would provide a composite biomarker of both extent of IM and  
58 a segment length estimate from the Cytosponge-TFF3 test alone. This biomarker could have a  
59 substantial impact on patient management: patients at higher cancer risk could be prioritized  
60 for endoscopy, and those patients likely to have focal cardia IM or a very short segment could  
61 be discharged to be followed up with further Cytosponge tests without requiring an endoscopy  
62 confirmation.

63 To develop a composite biomarker, we took the raw output of the deep learning-based  
64 Cytosponge-TFF3 IM-prediction model (7) (the count of the number of tiles considered TFF3/IM-  
65 positive by the model) for whole slide images of 529 Cytosponge patients in the BEST2 trial (14).  
66 We correlated these counts with the Prague C and M lengths from the subsequent endoscopy.  
67 Consistent with our expectation, we found that the quantity of IM from the Cytosponge-TFF3

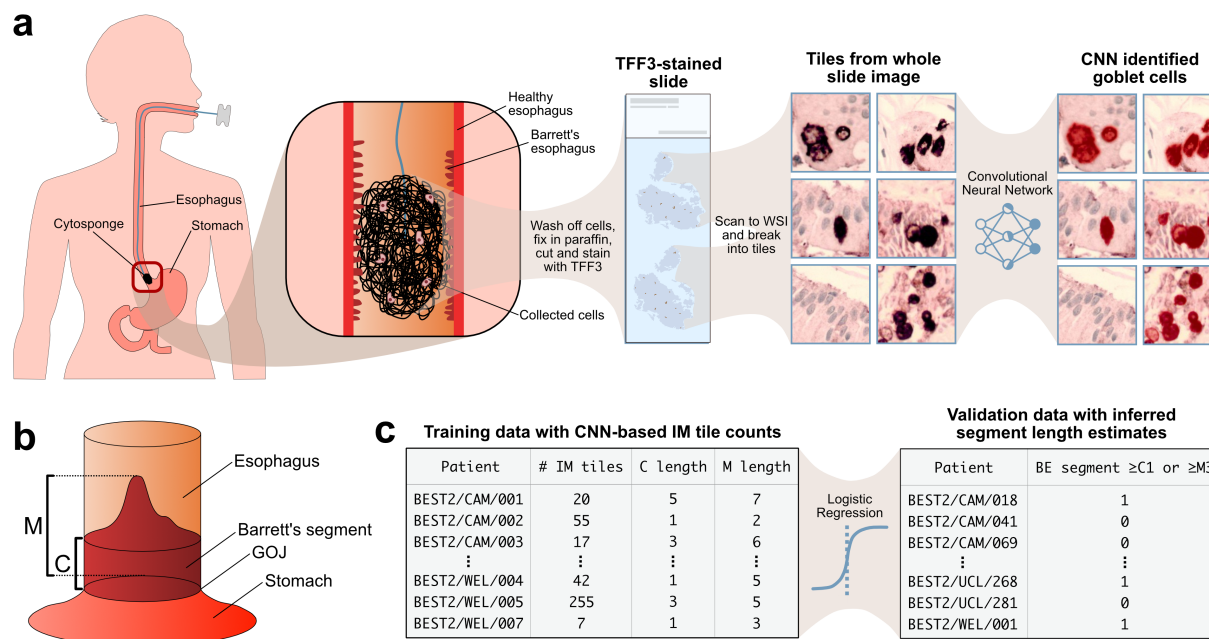

**Figure 1: Overview of Cytosponge-TFF3 preparation, Prague classification, and computational pipeline** (a) The Cytosponge collects cells from the esophagus including Barrett’s cells if they are present. After the patient swallows the capsule attached to a thread, the capsule dissolves in the stomach, where the sponge spherical expands. Pulling the sponge by the thread collects cells from the upper stomach and esophagus. The cells are washed off the sponge, processed into a pellet, embedded in paraffin, cut, and stained with TFF3, and put on a slide. Slides are then scanned into whole-slide images (WSIs), which can then be broken up into thousands of smaller images (“tiles”). These tiles are labeled by a pathologist for the presence of goblet cells indicating intestinal metaplasia and a convolutional neural network is trained to perform this classification task from these labels. (b) A diagram showing how the C and M lengths of the Prague classification criteria for segment length measurement are found. C (circumferential) denotes distance from the proximal margin of the gastric cardiac folds to the proximal margin of the circumferential BE segment, and M (maximal) describes the distance to the most proximal extent of the segment. GOJ = gastroesophageal junction. (c) The number of tiles classified as showing intestinal metaplasia (TFF3-positive) for slides in the training set are used to train a logistic regression model to predict the Barrett’s segment length. Length measurements are in centimeters.

68 assay as assessed by deep learning showed a highly significant correlation with segment length.  
69 For Prague C and M lengths for the 529 TFF3-positive BEST2 patients, there was a Spearman's  
70 rank correlation coefficient of 0.73 for C length and 0.77 for M length. A positive relationship  
71 is also visible when we plot the Prague C and M lengths against log of the TFF3-positive tile  
72 counts for the 529 patients (**fig. 2e-f**).

73 As a control, we took the raw output of the Cytosponge-H&E model from (7) for identifying  
74 tiles containing gastric tissue but no TFF3-positive tiles. As the presence of gastric tissue in a  
75 Cytosponge sample merely indicates that the device traversed through the lower esophageal  
76 sphincter into the stomach, it is expected that there should be little to no correlation between  
77 these gastric tile count and the Prague C and M lengths. Indeed, for the same 529 BEST2  
78 patients, Spearman's rank correlation coefficients between these tile counts and the C length  
79 was  $-0.024$ , and for M length was  $-0.046$ , confirming the null hypothesis for the control  
80 setting in comparison to IM tile count.

81 We next asked if the significant correlation between automatically identified IM quantity  
82 and the Barrett's segment length could be leveraged in an optimized prediction model. We  
83 compared two strategies: one was to predict C and M lengths as continuous values (regression-  
84 based approach) and the other one was to bin C and M lengths according to clinically relevant  
85 thresholds (classification-based approach) where particular importance is placed on Barrett's  
86 segments with C lengths greater than or equal to 1 cm, and M lengths greater than or equal to 3  
87 cm in accordance with current Barrett's diagnostic literature (11, 12, 15, 16). In both approaches  
88 the IM tile counts derived from machine learning applied to the Cytosponge-TFF3 test was the  
89 sole independent variable.

90 In the regression-based approach, we found that a zero-inflated Poisson (ZIP) regression  
91 model (17) yielded the best fit for the data (see **Methods**). We performed 5-fold cross validation  
92 on our 529 BEST2 patient cohort, all of whom underwent a Cytosponge followed by an oral

93 endoscopy. The ZIP models achieved a mean fold  $R^2$  error of 0.40 for predicting C length and  
94 0.40 for predicting M length (by comparison, Poisson regression without accounting for zero  
95 inflation achieves mean fold  $R^2$  errors of 0.22 for C length and 0.23 for M length). These results  
96 were not promising for clinical application.

97 In the classification-based approach, which takes advantage of established clinical thresh-  
98 olds, we trained a logistic regression model to classify whether or not a patient's Barrett's seg-  
99 ment had a C length at or above 1 cm or an M length at or above 3 cm ( $C \geq 1$  or  $M \geq 3$  vs.  $C < 1$   
100 and  $M < 3$ ). With 5-fold cross validation, the mean class-balanced validation accuracy of the  
101 logistic regression was 0.84 (0.82 unbalanced accuracy), the mean validation precision of the  
102 diagnostically positive class was 0.95, the recall 0.74, and the F1 score 0.83 (**fig. 2g**).

103 Next we applied this model for categorizing the segment length to the 162 patients from the  
104 BEST3 study (13) as an independent test set. It is important to note the differences between  
105 the clinical trials BEST2 and BEST3. BEST3 was a screening randomized controlled screen-  
106 ing trial, in which patients on anti-reflux medication who had not been endoscoped in the past  
107 5 years were invited for a Cytosponge test. Patients with a TFF3-positive result were invited  
108 for an endoscopy to confirm the presence of endoscopically visible columnar epithelium with  
109 IM on biopsy. It therefore includes patients with cardia IM and short Barrett's segments who  
110 would not fulfill the guidelines for surveillance monitoring (13). By contrast, BEST2 was a  
111 case-control cohort study in secondary care which recruited cases with known Barrett's esoph-  
112 agus undergoing surveillance (14). This cohort is therefore biased towards patients with longer  
113 segments requiring monitoring. Indeed, 315 of 529 BEST2 patients (59.5%) had segments with  
114  $C \geq 1$  cm or  $M \geq 3$  cm, compared to just 48 of 162 BEST3 patients (29.6%). Hence, BEST2 is  
115 ideal for training the model and BEST3 for application in a screening setting in which the clin-  
116 ician needs to evaluate the risk to benefit ratio of performing an endoscopy to confirm Barrett's  
117 esophagus.

118 When applied to patients in BEST3 with a TFF3-positive Cytosponge result the model had  
119 a precision of 0.90 for the short-segment class (80/89). The model incorrectly predicts 34  
120 patients to have a long-segment disease however the higher number of TFF3-positive tiles may  
121 reflect more extensive intestinal metaplasia including IM of the stomach—also a pre-malignant  
122 condition (18). Crucially, endoscopy only the 73 patients the model predicted to have long  
123 segments (39 true positives and 34 false positives) would allow for 55% of test set patients  
124 (89/162) to avoid endoscopy while only missing 5.6% of patients with long-segment disease  
125 (9 false negatives of 162). In view of this high precision for predicting short-segment disease,  
126 and the low cancer risk associated with focal cardia IM and short-segment Barrett’s a repeat  
127 Cytosponge after an interval (e.g., three years) would seem a good alternative to endoscopy.

128 Our results show that not only is there a correlation between intestinal metaplasia quantifica-  
129 tion from the Cytosponge-TFF3 test and Barrett’s segment length, but that a clinically relevant  
130 segment length cutoff is predictable with high accuracy from this quantification. This estab-  
131 lishes IM quantification as a relevant new biomarker for consideration in Barrett’s patients, as  
132 opposed to the binary classification currently used by pathologists or by the machine learning  
133 model reported previously (7).

134 In standard pathology reporting from glass slides it has not been feasible to quantify the  
135 degree of IM previously. However, since our predictions are gleaned from an entirely automated  
136 machine learning pipeline, this suggests that the incorporation of these new biomarkers into  
137 existing Barrett’s diagnosis and monitoring pathways should be readily achievable.

138 There is a big push towards more systematic screening for Barrett’s esophagus to improve  
139 outcomes from esophageal cancer (8, 12–14). In doing so, every effort must be made to max-  
140 imize the benefits and reduce the harms of screening. Hence, clinical investigations that ensue  
141 from a positive screening result should spare patients at very low risk for cancer and be af-  
142 fordable for the health care system. If Cytosponge was adopted for screening on a population

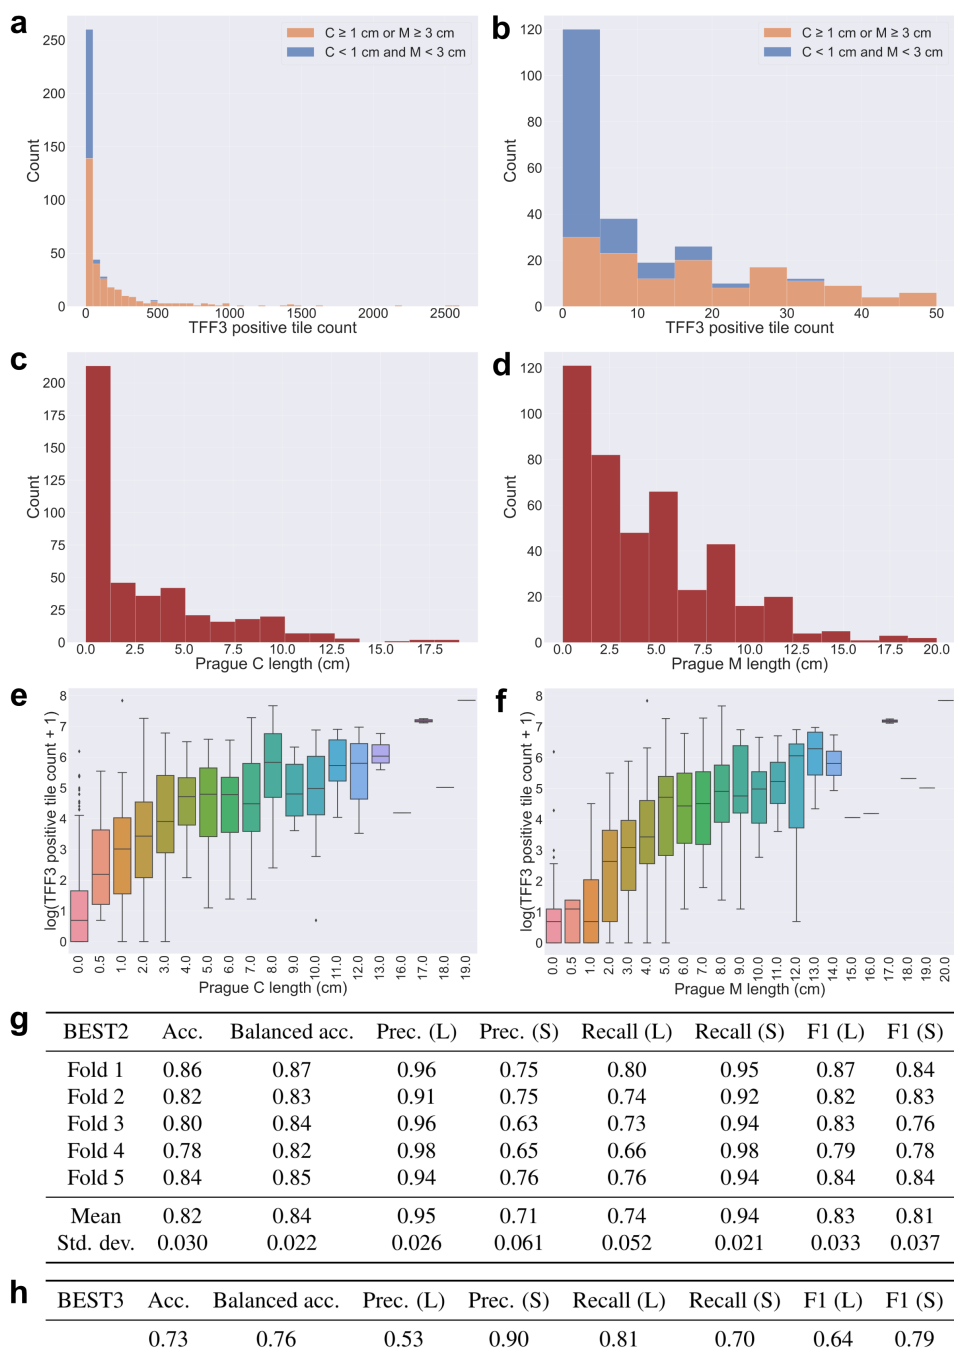

**Figure 2: Data and logistic regression results** (a) A stacked-bar histogram of the machine-learning derived TFF3-positive tile counts of BEST2 patients who underwent the Cytosponge-TFF3 test. Patients with 0 TFF3-positive tiles excluded from plot. (b) A stacked-bar histogram like (a) except only showing a TFF3-positive tile count range of 0–50. Patients with 0 TFF3-positive tiles excluded from plot. (c) A histogram of the ground truth Prague C lengths of BEST2 patients. Patients with 0 TFF3-positive tiles excluded from plot. (d) A histogram of the ground truth Prague M lengths of 529 BEST2 patients. Patients with 0 TFF3-positive tiles excluded from plot. (e) A box-and-whiskers plot showing the log of TFF3-positive tile count vs. Prague C length for 529 BEST2 patients. (f) A box-and-whiskers plot showing the log of TFF3-positive tile count vs. Prague M length for 529 BEST2 patients. (g) Accuracy, class-balanced accuracy, precision, recall, and F1 results of 5-fold cross-validation on 529 BEST2 patients applied to a logistic regression model for predicting whether or not the patient’s Barrett’s segment had C length greater than or equal to 1 cm or M length greater than or equal to 3 cm. L (“long segment”) stands for the  $C \geq 1$  or  $M \geq 3$  class; S (“short segment”) stands for the  $C < 1$  and  $M < 3$  class. (h) Results of training a model like that of (g), except training on all 529 BEST2 patients without cross-validation and then inferring on a 162-patient test set of BEST3 patients. BEST3 results shown.



143 scale, deep-learning based IM quantification from Cytosponge-TFF3 and the accompanying  
144 Barrett's segment prediction could help focus endoscopy on those who need it most. A similar  
145 approach could also be applied to Barrett's surveillance procedures using Cytosponge or endo-  
146 scopic biopsies to quantify the degree of IM as part of a cancer risk score. Overall, these results  
147 are progress towards stratifying patients at increased cancer risk for expedient endoscopy while  
148 saving lower-risk patients from more invasive procedures as well as the resources for perform-  
149 ing them.

## 150 **Methods**

151 The deep learning model to elucidate the number TFF3-positive tiles comes from a deep learn-  
152 ing pipeline described in full in (7), and making use of PathML to perform the tiling task (19).  
153 Cytosponge samples with an H&E slide showing inadequate amounts of gastric tissue (as de-  
154 termined automatically in (7)) were excluded. The logistic regression model for predicting  
155 segment length from IM tile count was implemented with the `glm()` function in the R pro-  
156 gramming language, and the Spearman's correlation was performed with R's `cor()` function.  
157 Zero-inflated Poisson regression was performed with R's `pscl` library (20). Plots were gener-  
158 ated with Python's `matplotlib` library.

159 Documented code with instructions for running the analyses shown in this paper, includ-  
160 ing generating diagnostic plots for the regression model, can be found at the following public  
161 repository: <https://github.com/markowetzlab/barretts-segment-length-predictor>.  
162

## 163 **Code availability**

164 The data and fully documented code to perform all of the analyses of this paper can be found  
165 at this public repository in the form of two illustrative Jupyter notebooks: <https://github.com/markowetzlab/barretts-segment-length-predictor>.

166 .com/markowetzlab/barretts-segment-length-predictor.

## 167 **Acknowledgments**

168 We would like to thank William Orchard for his assistance on the regression model, as well as  
169 Marcel Gehrung for producing the model from which TFF3-positive tile counts were derived.  
170 We would also like to thank the pathologists of Addenbrooke's Hospital for their previous scor-  
171 ing of Cytosponge-TFF3 and Cytosponge-H&E slides as part of the BEST clinical trials. This  
172 research was supported by Cancer Research UK (FM: C14303/A17197), a Medical Research  
173 Council programme grant (RCF: RG84369) and Cambridge University Hospitals NHS Founda-  
174 tion Trust. BEST2 was funded by Cancer Research UK (12088 and 16893). We would also like  
175 to thank the NIHR Cambridge Biomedical Research Centre (BRC-1215-20014) and the Exper-  
176 imental Cancer Medicine Centre for their support. AGB acknowledges support from a Gates  
177 Cambridge Scholarship from the Bill & Melinda Gates Foundation. FM is a Royal Society  
178 Wolfson Research Merit Award holder.

## 179 **Author contributions**

180 RCF conceived the study. AGB implemented the analyses. All work was performed under the  
181 supervision of FM and RCF The final manuscript was read and approved by all authors.

## 182 **Declaration of interests**

183 R.C.F is named on patents related to Cytosponge-TFF3 that have been licensed by the Medical  
184 Research Council to Covidien (now Medtronic). RCF is a founder and shareholder of Cyted  
185 Ltd. FM is a founder, director and shareholder of Tailor Bio.

## 186 References

- 187 1. Bray, F. *et al.* Global cancer statistics 2018: Globocan estimates of incidence and mortality world-  
188 wide for 36 cancers in 185 countries. *CA: a cancer journal for clinicians* **68**, 394–424 (2018).
- 189 2. Pohl, H., Sirovich, B. & Welch, H. G. Esophageal adenocarcinoma incidence: are we reaching the  
190 peak? *Cancer Epidemiology and Prevention Biomarkers* **19**, 1468–1470 (2010).
- 191 3. Smyth, E. C. *et al.* Oesophageal cancer. *Nature reviews Disease primers* **3**, 17048 (2017).
- 192 4. Peters, Y. *et al.* Barrett oesophagus. *Nature Reviews Disease Primers* **5** (2019). URL <https://doi.org/10.1038/s41572-019-0086-z>.  
193
- 194 5. Ross-Innes, C. S. *et al.* Evaluation of a minimally invasive cell sampling device coupled with  
195 assessment of trefoil factor 3 expression for diagnosing barrett’s esophagus: a multi-center case-  
196 control study. *PLoS medicine* **12**, e1001780 (2015).
- 197 6. Paterson, A. L., Gehrung, M., Fitzgerald, R. C. & O’Donovan, M. Role of tff3 as an adjunct in  
198 the diagnosis of barrett’s esophagus using a minimally invasive esophageal sampling device—the  
199 cytosponge. *Diagnostic Cytopathology* (2019). URL <https://onlinelibrary.wiley.com/doi/abs/10.1002/dc.24354>. <https://onlinelibrary.wiley.com/doi/pdf/10.1002/dc.24354>.  
200  
201
- 202 7. Gehrung, M. *et al.* Triage-driven diagnosis of barrett’s esophagus for early detection of esophageal  
203 adenocarcinoma using deep learning. *Nature Medicine* **27**, 833–841 (2021).
- 204 8. Sharma, P. *et al.* Dysplasia and cancer in a large multicenter cohort of patients with barrett’s esoph-  
205 agus. *Clinical Gastroenterology and Hepatology* **4**, 566–572 (2006).
- 206 9. Bhat, S. *et al.* Risk of malignant progression in barrett’s esophagus patients: Results from a large  
207 population-based study. *Journal of the National Cancer Institute* **103**, 1049–1057 (2011).
- 208 10. Sharma, P. *et al.* The development and validation of an endoscopic grading system for barrett’s  
209 esophagus: the prague c & m criteria. *Gastroenterology* **131**, 1392–1399 (2006).
- 210 11. Shaheen, N. J., Falk, G. W., Iyer, P. G. & Gerson, L. B. Acg clinical guideline: Diagnosis and  
211 management of barrett’s esophagus. *American Journal of Gastroenterology* **111**, 30–50 (2016).
- 212 12. Fitzgerald, R. C. *et al.* British society of gastroenterology guidelines on the diagnosis and manage-  
213 ment of barrett’s oesophagus. *Gut* **63**, 7–42 (2018).
- 214 13. Fitzgerald, R. C. *et al.* Cytosponge-trefoil factor 3 versus usual care to identify barrett’s oesophagus  
215 in a primary care setting: a multicentre, pragmatic, randomised controlled trial. *The Lancet* **396**,  
216 333–344 (2020).
- 217 14. Ross-Innes, C. *et al.* Risk stratification of barrett’s oesophagus using a non-endoscopic sampling  
218 method coupled with a biomarker panel: a cohort study. *Lancet Gastroenterol Hepatol.* **2**, 23–31  
219 (2017).

- 220 15. Parasa, S. *et al.* Development and validation of a model to determine risk of progression of barrett’s  
221 esophagus to neoplasia. *Gastroenterology* **154**, 1282–1289.e2 (2018).
- 222 16. Qumseya, B. *et al.* Asge guideline on screening and surveillance of barrett’s esophagus. *Gastroin-*  
223 *testinal Endoscopy* **90**, 335–359.e2 (2019).
- 224 17. Lambert, D. Zero-inflated poisson regression, with an application to defects in manufacturing. *Tech-*  
225 *nometrics* **34**, 1–14 (1992).
- 226 18. Hadjinicolaou, A. *et al.* Cytosponge-ttf3 testing can detect precancerous mucosal changes of the  
227 stomach. *Clinical Gastroenterology and Hepatology* **In press** (2021).
- 228 19. Berman, A. G., Orchard, W. R., Gehrung, M. & Markowitz, F. Pathml: A unified framework for  
229 whole-slide image analysis with deep learning. *medRxiv* (2021). URL [https://www.medrxiv](https://www.medrxiv.org/content/early/2021/07/13/2021.07.07.21260138)  
230 [v.org/content/early/2021/07/13/2021.07.07.21260138](https://www.medrxiv.org/content/early/2021/07/13/2021.07.07.21260138). [https://www.me](https://www.medrxiv.org/content/early/2021/07/13/2021.07.07.21260138.full.pdf)  
231 [drxiv.org/content/early/2021/07/13/2021.07.07.21260138.full.pdf](https://www.medrxiv.org/content/early/2021/07/13/2021.07.07.21260138.full.pdf).
- 232 20. Zeileis, A., Kleiber, C. & Jackman, S. Regression models for count data in R. *Journal of Statistical*  
233 *Software* **27** (2008). URL <http://www.jstatsoft.org/v27/i08/>.
